# Supplementary material
Source: MDPI journal article supplement (https://www.mdpi.com/2073-4344/11/8/981)
Supplement: s1 [file s1 › catalysts-1295538 supp for conversion new.pdf]

## Supplementary materials

Article

# Magnesium Impregnated on NaX Zeolite Synthesized from Cogon Grass Silica for Fast Production of Fructose via Microwave-Assisted Catalytic Glucose Isomerization

Sittichai Kulawong <sup>1,\*</sup>, Saran Youngjan <sup>2</sup>, Pongtanawat Khemthong <sup>2</sup>, Narong Chanlek <sup>3</sup>, Jatuporn Wittayakun <sup>4</sup> and Nattawut Osakoo <sup>4,5,†</sup>

<sup>1</sup> Program of Chemistry, Faculty of Science and Technology, Nakhon Ratchasima Rajabhat University, Nakhon Ratchasima 30000, Thailand

<sup>2</sup> National Nanotechnology Center (NANOTEC), National Science and Technology Development Agency (NSTDA), Klong Laung, Pathumthani 12120, Thailand; saran.you@nanotec.or.th (S.Y.); pongtanawat@nanotec.or.th (P.K.)

<sup>3</sup> Research Facility, Synchrotron Light Research Institute, Nakhon Ratchasima 30000, Thailand; narong@slri.or.th

<sup>4</sup> School of Chemistry, Institute of Science, Suranaree University of Technology, Nakhon Ratchasima 30000, Thailand; jatuporn@sut.ac.th (J.W.); nattawut.o@g.sut.ac.th (N.O.)

<sup>5</sup> Institute of Research and Development, Suranaree University of Technology, Nakhon Ratchasima 30000, Thailand; nattawut.o@g.sut.ac.th

\* Correspondence: sittichai.k@nrru.ac.th; Tel.: +66-862-525-250

† Co-corresponding author: nattawut.o@g.sut.ac.th

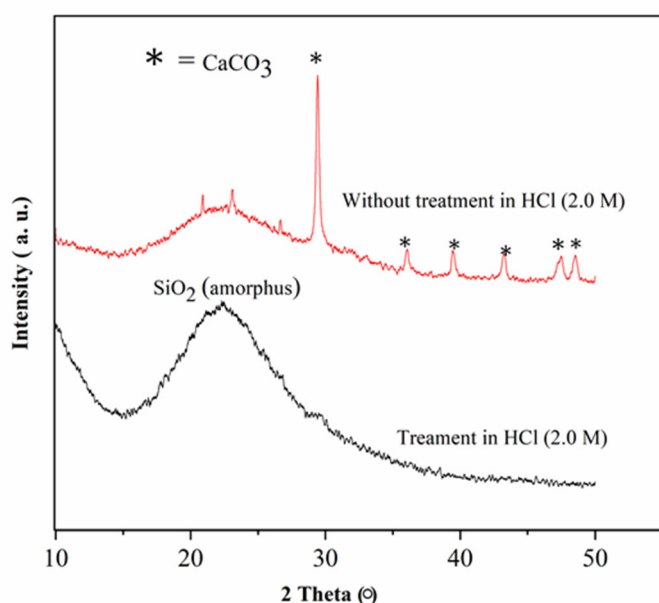

**Figure S1.** XRD patterns of calcined cogon grass with and without treated in HCl (2.0 M).

**Table S1.** Solid yield after calcination based on the weight of dried cogon grass and chemical composition determined by AAS.

| Sample                           | Yield (% wt) | Composition (% wt.)            |                  |                                |                                |                   |
|----------------------------------|--------------|--------------------------------|------------------|--------------------------------|--------------------------------|-------------------|
|                                  |              | Al <sub>2</sub> O <sub>3</sub> | SiO <sub>2</sub> | K <sub>2</sub> CO <sub>3</sub> | Fe <sub>2</sub> O <sub>3</sub> | CaCO <sub>3</sub> |
| Without treatment in HCl (2.0 M) | 9.62         | 0.52                           | 69.56            | 10.05                          | 0.08                           | 19.79             |
| Treatment in HCl (2.0 M)         | 9.25         | 0.06                           | 99.25            | 0.05                           | 0.01                           | 0.63              |

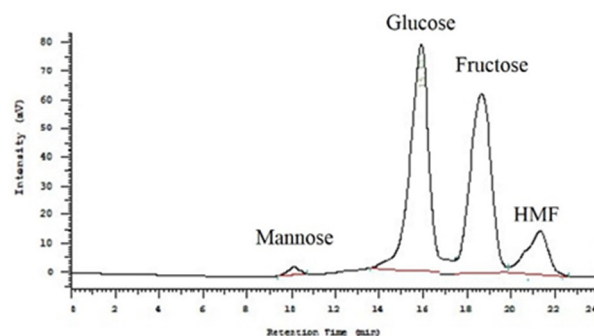**Figure S2.** HPLC chromatogram of the products obtained from 9Mg/NaX catalyst.**Table S2.** Relative crystallinity and Mg leaching content of consecutive cycle run.

| Catalytic Testing (cycle)  | Relative Crystallinity (%) | Mg Leaching (ppm) |
|----------------------------|----------------------------|-------------------|
| 6Mg/NaX (fresh)            | 100                        | -                 |
| 6Mg/NaX (1 <sup>st</sup> ) | 91                         | 343               |
| 6Mg/NaX (2 <sup>nd</sup> ) | 83                         | 248               |
| 6Mg/NaX (3 <sup>rd</sup> ) | 72                         | 143               |
| 6Mg/NaX (4 <sup>th</sup> ) | 22                         | 121               |

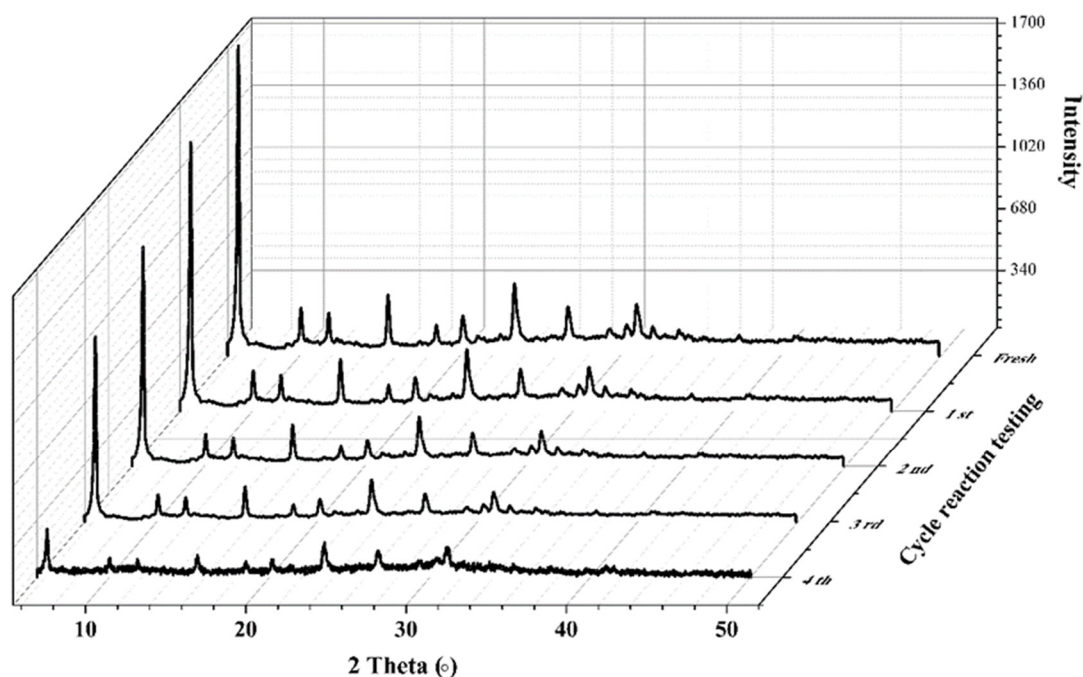**Figure S3.** XRD patterns of spent 6Mg/NaX catalyst with each consecutive run.
